# NEST Desktop - An educational application for neuroscience

**Sebastian Spreizer**\*<sup>1,2,3,4</sup>, Johanna Senk<sup>3</sup>, Stefan Rotter<sup>1,2</sup>, Markus Diesmann<sup>3,5,6</sup>, and Benjamin Weyers<sup>4</sup>

<sup>1</sup>Faculty of Biology, University of Freiburg, 79104 Freiburg, Germany

<sup>2</sup>Bernstein Center Freiburg, University of Freiburg, 79104 Freiburg, Germany

<sup>3</sup>Institute of Neuroscience and Medicine (INM-6) and Institute for Advanced Simulation (IAS-6) and JARA-Institute Brain Structure-Function Relationships (INM-10), Jülich Research Centre, 52428 Jülich, Germany

<sup>4</sup>Department of Computer Science, University of Trier, 54296 Trier, Germany

<sup>5</sup>Department of Psychiatry, Psychotherapy and Psychosomatics, School of Medicine, RWTH Aachen University, 52074 Aachen, Germany

<sup>6</sup>Department of Physics, Faculty 1, RWTH Aachen University, 52074 Aachen, Germany

\* Corresponding author: spreizer@uni-trier.de

## Abstract

Simulation software for spiking neuronal network models matured in the past decades regarding performance and flexibility. But the entry barrier remains high for students and early career scientists in computational neuroscience since these simulators typically require programming skills and a complex installation. Here, we describe an installation-free Graphical User Interface (GUI) running in the web browser, which is distinct from the simulation engine running anywhere, on the student's laptop or on a supercomputer. This architecture provides robustness against technological changes in the software stack and simplifies deployment for self-education and for teachers. Our new open source tool, NEST Desktop, comprises graphical elements for creating and configuring network models, running simulations, and visualizing and analyzing the results. NEST Desktop allows students to explore important concepts in computational neuroscience without the need to learn a simulator control language before. Our experiences so far highlight that NEST Desktop helps advancing both quality and intensity of teaching in computational neuroscience in regular university courses. We view the availability of the tool on public resources like the European ICT infrastructure for neuroscience EBRAINS as a contribution to equal opportunities.

# Significance Statement

The graphical user interface NEST Desktop makes neuronal network simulations accessible to non-programmers. It facilitates the interactive exploration of neuronal network models by integrating the whole workflow of wiring up the setup, simulating the neuronal dynamics, and analyzing the recorded activity data into a single tool. NEST Desktop effectively supports teaching the concepts and methods of computational neuroscience. Due to its installation-free web-based implementation, it is in particularly suitable for online courses.

# Introduction

Complementary to experiment and theory, simulations of computational models represent an essential research tool in neuroscience. Neuronal network models integrate available knowledge of the brain's individual constituents and their complex interactions with the aim to simulate neuronal activity matching data observed experimentally (Tikidji-Hamburyan et al., 2017). Dedicated open-source software tools, partially with decades of ongoing development and maintenance (Brette et al., 2007), promote the reproducibility of simulations, reuse and extension of code, and efficient usage of hardware. Many of these tools rely on textual, general-purpose programming languages (Einevoll et al., 2019) primarily designed for routine use by specialized researchers. Computational neuroscience, however, is an interdisciplinary field and scientists without strong background in programming often struggle to get started with the concepts and usage of simulators. Often enough they shipwreck already due to the complex installation of the software. To lower the entry barrier for these tools, and to provide access for non-programmers, a number of simulation engines have been equipped with Graphical User Interfaces (GUIs) to easily control simulations or explore network activity, see Table 1 for an overview.

With our present work, we focus on college and university students as a specific user group where significant programming skills cannot be assumed. We present a web-based software tool, which has been specifically developed to support education and training of basic computational neuroscience for individual learners and classroom teaching. In addition, it is suited for online courses. The main educational

---

<sup>1</sup><https://github.com/nengo/nengo-gui>

<sup>2</sup><https://github.com/compneuronmbu/NESTInstrumentationApp>

<sup>3</sup><https://github.com/MetaCell/NEURON-UI>

| Development | GUI                         | Simulator   | Environment | Reference                                                                     |
|-------------|-----------------------------|-------------|-------------|-------------------------------------------------------------------------------|
| 1992        | GENESIS GUI                 | GENESIS     | x11         | <a href="#">Bower and Beeman (2012)</a>                                       |
| 1993        | NEURON GUI                  | NEURON      | x11         | <a href="#">Hines (1993)</a> ; <a href="#">Hines and Carnevale (1997)</a>     |
| 1995        | SLIDE                       | NEST        | x11         | <a href="#">Matyak et al. (1995)</a> ; <a href="#">Gewaltig et al. (1996)</a> |
| 2007        | neuroConstruct              | multiple    | x11         | <a href="#">Gleeson et al. (2007)</a>                                         |
| 2008        | SNN3DViewer                 | none        | x11         | <a href="#">Kasiński et al. (2009)</a>                                        |
| 2009        | Neuronvisio                 | NEURON      | x11 (qt4)   | <a href="#">Cope et al. (2017)</a>                                            |
| 2011        | nuSPIC                      | NEST        | HTML        | <a href="#">Vlachos et al. (2013)</a>                                         |
| 2012        | The Virtual Brain (TVB)     | TVB         | HTML        | <a href="#">Sanzleon et al. (2013)</a>                                        |
| 2013        | N2A (Neurons to Algorithms) | multiple    | x11 (qt5)   | <a href="#">Rothganger et al. (2014)</a>                                      |
| 2013        | SpineCreator                | PyNN        | x11 (qt5)   | <a href="#">Mattioni et al. (2012)</a>                                        |
| 2013        | VisNEST                     | none (NEST) | VR          | <a href="#">Nowke et al. (2013)</a>                                           |
| 2014        | Neuronify                   | Neuronify   | x11 (qt5)   | <a href="#">Dragly et al. (2017)</a>                                          |
| 2014        | Open Source Brain (OBS)     | PyNN        | HTML        | <a href="#">Gleeson et al. (2019)</a>                                         |
| 2015        | Nengo GUI                   | Nengo       | HTML        | Source code <sup>1</sup>                                                      |
| 2015        | ViSimpl                     | none        | x11 (qt5)   | <a href="#">Galindo et al. (2016)</a>                                         |
| 2016        | <b>NEST Desktop</b>         | NEST        | HTML        | Source code <sup>9</sup>                                                      |
| 2016        | VIOLA                       | none        | HTML        | <a href="#">Senk et al. (2018)</a>                                            |
| 2016        | Visbrain                    | none        | x11 (qt5)   | <a href="#">Combrisson et al. (2019)</a>                                      |
| 2017        | NESTInstrumentationApp      | NEST        | HTML        | Source code <sup>2</sup>                                                      |
| 2017        | NetPyNE UI                  | NetPyNE     | HTML        | <a href="#">Dura-Bernal et al. (2019)</a>                                     |
| 2017        | NEURON UI                   | NEURON      | HTML        | Source code <sup>3</sup>                                                      |
| 2018        | CellExplorer                | none        | x11 (qt5)   | <a href="#">Petersen et al. (2020)</a>                                        |

Table 1: **History of GUI development in computational neuroscience.** GUIs are ordered chronologically according to the estimated beginning of their development phase (mentioned in a paper or first commit in a public repository). Most GUIs are coupled with a simulation engine in a specific front end environment. If a GUI is independent of specific simulators, the respective entry is “none”. “none (NEST)” in the case of VisNEST means that the application has full operational function without the simulator NEST but it can be connected to it. For more information, the last column lists the corresponding publications or refers to the source code.

objective is to develop solid understanding of how numerical simulations can be employed as a meaningful research tool in neuroscience. The methodological question is how the anatomy, physiology, and biophysics of neuronal systems should be translated into specific algorithmic components of a numerical simulation. Our didactic strategy is to enable exciting hands-on experience and rewarding results without delay and without big effort. The concept appeals to common sense and scientific intuition. It makes students enjoy the lessons, and invites independent creative research. For a successful implementation, we seek a framework that fulfills the following requirements. First, the tool needs to offer functionality that enables students to create a neuronal network model visually and interactively. Thus, there is no need for programming at this stage and the focus lies more on the neuroscientific questions. Second, there is the need to inspect the simulation results, in the sense of a constructive approach in learning ([Clark and Mayer, 2011](#); [de Jong et al., 2013](#)). For this purpose, a simulator needs to be loaded

with the model and executed, and it should then offer an easy-to-understand presentation of the results. This can then be the basis of a new iteration with an adapted model. Third, the tool should offer the use of standard models, storing and loading previous models as well as the creation of reports. Finally, the tool needs a high level of usability, should be easy to install, and scale up to a classroom size number of users.

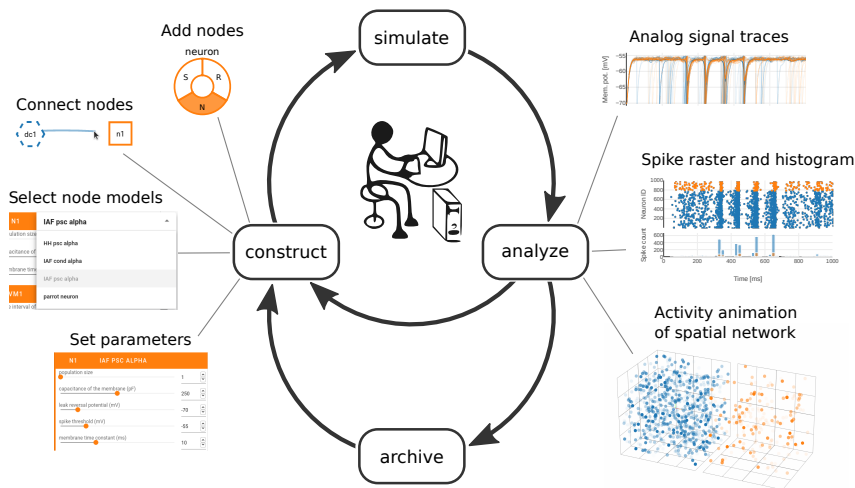

**Figure 1: NEST Desktop workflow enables fast prototyping of neuronal network simulations.** The GUI allows the user to control network construction, simulation, data analysis, and archiving via graphical elements. All these steps can be executed consecutively and repeatedly to explore model properties and resulting network dynamics. Constructing a network involves the selection and connection of nodes as well as their parameterization ('construct', left). After the simulation of a constructed network ('simulate', top), recorded analog signals and spiking activity can be assessed in various charts ('analyze', right). The user is also able to export and archive networks and results for documentation and later use ('archive', bottom).

The tool presented in this work is called NEST Desktop and aims to convey the structural and dynamical behavior of biological neuronal networks by addressing the requirements listed above. Building on what students with a general background in neuroscience are already familiar with, virtual experiments are conducted in similar steps, and described with similar terminology as known from biological experiments. Designed around the concept of constructivistic experimenting and fast prototyping, NEST Desktop allows users to explore key aspects of neuronal network modeling via a GUI: network construction and parameterization, running simulations, data analysis, and documentation can all be performed by means of interactive visualization (Fig. 1). In the background, NEST Desktop uses the NEural Simulation Tool (NEST, Gewaltig and Diesmann, 2007) as a reference simulation engine. NEST focuses on small to large networks of spiking neurons and comprises a collection of simple and more biophysically

detailed neuron models. NEST Desktop is installation-free and requires only a modern web browser.

The manuscript is structured as follows: The section Materials and Methods elucidates technical details of NEST Desktop. In Results, we describe the main components and functionality of NEST Desktop, and exemplify its usage with a use case about teaching in a classroom and supporting research. We have previously employed NEST Desktop in university courses and were able to make the experience that NEST Desktop successfully supports students to complete the course also in times of online courses due to the COVID-19 pandemic. The Discussion embeds the work in the state of research and reflects on general achievements, current limitations, and potential future developments.

Preliminary results have been published in abstract form ([Spreizer, 2018](#); [Spreizer et al., 2019, 2020](#)).

## Materials and Methods

### Client-server architecture

NEST Desktop uses a client-server architecture (Fig. 2A,B): the client provides the GUI as front end and handles network construction, simulation-code generation, and analysis of activity data (Fig. 2B, purple row); the server runs the simulation engine NEST ([Gewaltig and Diesmann, 2007](#)) as back end and executes the simulation code (Fig. 2B, yellow row). This separation enables a lightweight and platform-independent implementation of NEST Desktop as a web application. The deployment of a NEST installation and an execution environment with sufficient computational resources is provided by the running infrastructure and is therefore outside of the user's responsibility. However, this architecture requires the back end to remain stateless, which means that the data of the simulation (network model and simulation results) are stored only on the client side.

Standard data formats are used for communication to ensure compatibility of these front end and back end systems. NEST 3 ([Hahne et al., 2021](#)) offers 'NEST Server' as a server-side wrapper of NEST in Python, which enables the communication of NEST Desktop as GUI on the client side (i.e., in the browser) and 'NEST Simulator' (or just 'NEST') as simulation engine on the server side. NEST Desktop and NEST Server use JSON for the server-to-browser (stateless) communication over standard HTTP as communication protocol. JSON is a language-independent data format which can be applied in JavaScript, enabling interactive web pages, and is interpretable by most programming languages in-

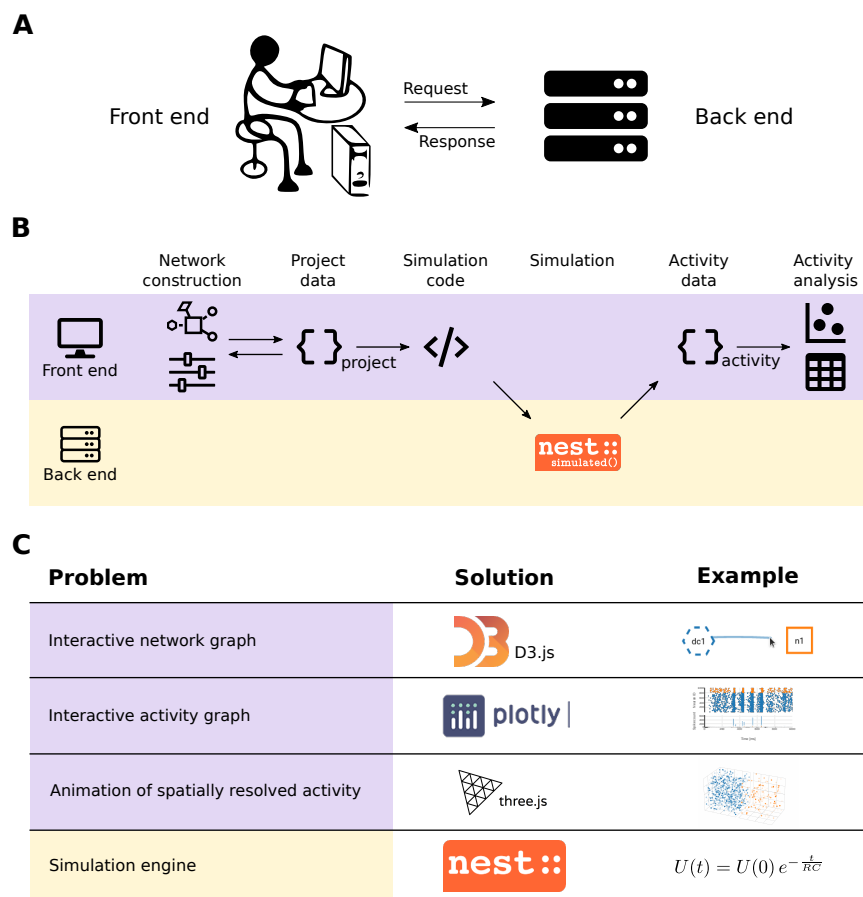

Figure 2: **Workflow in client-server architecture and technical challenges.** (A) Simplified relationship of the client (front end) and the server (back end). (B) The front end handles network construction and data analysis, whereas the back end executes simulations with NEST (Gewaltig and Diesmann, 2007). (C) Problem formulations regarding the software architecture (left column) together with the technical solutions implemented in NEST Desktop (center column) and associated examples (right column).

cluding Python.

### Front end implementation

The GUI as a front end (Fig. 2, purple rows) makes use of modern web technologies (e.g., responsive design) and external open-source libraries based on HTML5 and JavaScript. NEST Desktop 3 is based on the open-source web application framework ‘Vue.js’<sup>4</sup>, which provides a collection of standard GUI widgets and components. The GUI styles offered by ‘Vuetify’<sup>5</sup> are already used in many other applications and, thus, offer a certain level of consistency in the GUI design for NEST Desktop.

The visual components of NEST Desktop rely on various JavaScript libraries (Fig. 2C). Graphical repre-

<sup>4</sup><https://vuejs.org>

<sup>5</sup><https://vuetifyjs.com>

sentations of neuronal networks use ‘D3.js’<sup>6</sup>. Interactive charts to display simulated activity are realized with ‘Plotly.js’<sup>7</sup>. 3D animated renderings of activity data resulting from simulations of spatially structured networks use ‘Three.js’<sup>8</sup>.

For data handling, NEST Desktop uses ‘PouchDB’ to store data in IndexedDB which is by default built into the web browser. ‘PouchDB’ is a JavaScript-based library for ‘CouchDB’ and manages databases with a version-control system.

## Back end implementation

The back end (Fig. 2, yellow rows) hosts first and foremost the simulation engine NEST and it is programmed in Python 3 in conjunction with generic C++. The interface is set up such that the user can directly communicate with NEST via NEST Desktop. NEST predefines models for neurons, devices, and synapses that are directly selectable in the GUI. Detailed model descriptions can be requested from the NEST Server via RESTful API.

## Development, installation and documentation

The source code of NEST Desktop is open-source and available on the GitHub platform<sup>9</sup> under MIT License (Fig. 3, middle left).

A software package for NEST Desktop is published on Python Package Index (PyPI), a third-party software repository for Python<sup>10</sup> (Fig. 3, top left). With hosting on PyPI, NEST Desktop and its dependency (NEST Server) can be installed via the ‘pip’ package manager.

In addition, we wrap the NEST ecosystem, which combines NEST Simulator and NEST Server and requires a Linux-based environment, into multiple Docker containers (Fig. 3, top right). The front end is ready for download from Docker Hub<sup>11</sup>. Multiple containers (NEST Desktop, NEST Server) can be pulled and started with Docker Compose using the configuration file ‘docker-compose.yml’ (Fig. 3, top right). With this approach, we enable a wide deployment of the system on any infrastructure (Fig. 3, middle right). In this way, NEST Desktop is already deployed on EBRAINS<sup>12</sup>, the research infrastructure

<sup>6</sup><https://d3js.org>

<sup>7</sup><https://plot.ly/javascript>

<sup>8</sup><https://threejs.org>

<sup>9</sup><https://github.com/nest-desktop/nest-desktop>

<sup>10</sup><https://pypi.org/project/nest-desktop>

<sup>11</sup><https://hub.docker.com/r/nestdesktop/app>

<sup>12</sup><https://ebrains.eu/service/nest-desktop>

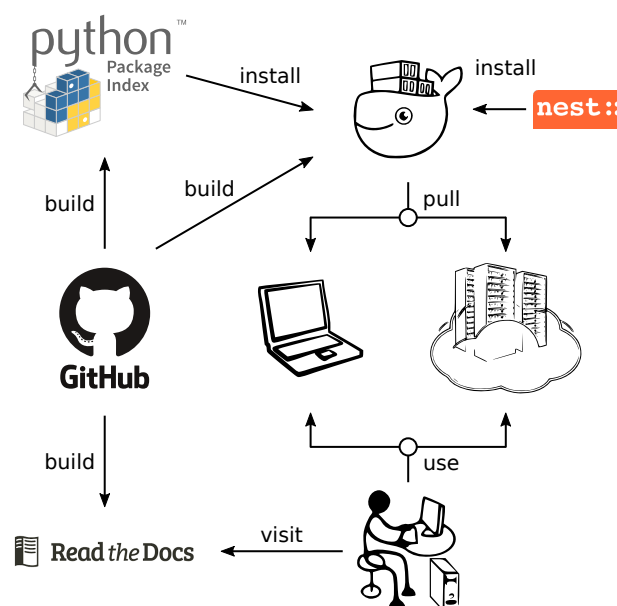

Figure 3: **Software development and documentation of NEST Desktop.** The source code is open-source and available on GitHub. The development of NEST Desktop makes use of Python Package Index and Docker Hub. An associated docker image containing NEST Desktop together with the simulator NEST can be pulled on any local machine or server infrastructure. The ReadTheDocs platform provides detailed information about NEST Desktop for users, lecturers, deployers, and developers.

developed by the Human Brain Project<sup>13</sup>. Everyone with an EBRAINS account can use NEST Desktop there without installation. Furthermore, NEST Desktop was deployed on bwCloud<sup>14</sup>, a university-internal cloud computing resource for teaching purposes. Users are also able to install and run NEST Desktop on their local machines with a single command line “docker-compose start” (Fig. 3, middle center).

A detailed documentation for NEST Desktop is available on the ReadTheDocs platform<sup>15</sup> (Fig. 3, bottom left). The documentation is organized in separate sections for users, lecturers, deployers, and developers. The user documentation guides users to build networks, parameterize nodes and connections, and perform simulations. Lecturers learn how to deliver course material using NEST Desktop. Deployers find instructions to set up NEST Desktop on a machine via the Python Package or using Docker or Singularity installations instead. Developers get first insights into the code base of NEST Desktop and are welcome to contribute.

<sup>13</sup><https://humanbrainproject.eu>

<sup>14</sup><https://www.bw-cloud.org>

<sup>15</sup><https://nest-desktop.readthedocs.io>





## A Network editor

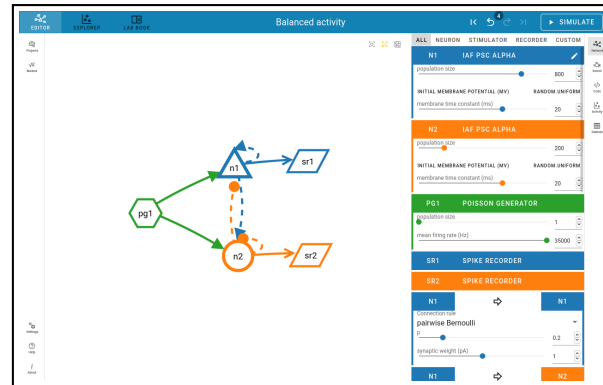

## B Network graph

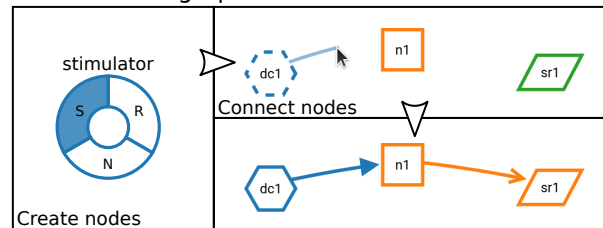

## C Network controller

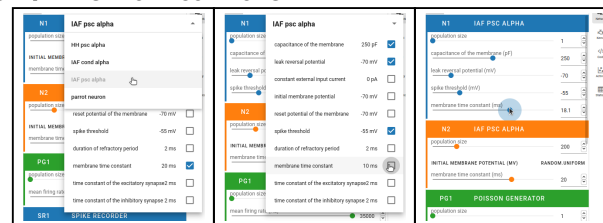

**Figure 5: Visual network construction.** (A) The network editor is the main work space to graphically construct a network graph (left) and adjust network properties with the controller panel (right). Stacks of node and connection parameters associated with the chosen models are displayed in colored panels. (B) A right-click with the mouse in the blank space of the editor opens a creation panel (left) to add a node to the network. Node types are stimulator (S), neuron (N), and recorder (R). Connections between nodes are drawn with the mouse cursor (top right). A minimal network may consist of a stimulator, a neuron, and a recorder (bottom right). (C) Models can be selected from a drop-down menu (left). Then, a subset of parameters can be selected (middle) which can be modified (right) by moving sliders, incrementally increasing and decreasing, or directly entering values.

## Graphical construction of neuronal networks in the network editor

The ‘network editor’ allows the visual construction of a network graph by selecting and assembling node and connection elements (Fig. 5A). The appearance of those elements is inspired by the graphical notation proposed by [Senk et al. \(2020\)](#).

Clicking the right mouse button in the network graph area triggers the creation of a new node (Fig. 5B, left). A pie menu shows the available node types to choose from. Node types are distinguishable by

unique shapes. Stimulator (S) nodes have a hexagon shape; they act as input devices that produce signals to be transmitted towards target nodes. Recorder (R) nodes have a parallelogram shape; they represent devices that record signals emitted by other nodes. Neuron (N) nodes integrate the input they receive from other nodes and transform them to recordable outputs. Per default, neuron nodes are of a general type and depicted as squares. The neuron node type can be refined further when nodes are connected. Nodes get distinct colors, which help to associate them with their respective parameter settings and simulated activity throughout the tool.

A directed connection between two nodes is established by clicking first on the connector of a source node and then on a target node (Fig. 5B, right). Selecting the same node both as source and target is also allowed. The arrow representing the connection has the same color as the source node. If all connections from a particular source neuron node to other neuron nodes are parameterized with positive weights, the type of the source neuron node gets refined to be excitatory; if all outgoing weights are negative, the node is inhibitory. Excitatory neuron nodes have triangular shapes resembling pyramidal neurons, and inhibitory ones have a circular shape.

Nodes and connections are configured via the controller panel to the right of the network graph area (Fig. 5A, right). The user can specify properties of the graph elements by, first, choosing predefined models via a drop-down menu and, second, adjusting its parameter values with sliders or by directly typing the numbers. A neuron node, for instance, may represent a whole population of individual neurons sharing the same model. Each of the available models is part of NEST and has its own set of parameters and the user can query the available model descriptions. The user is able to change the model and start over with a new set of parameters (Fig. 5C, left). The popup provides a list of all available parameters of a given model out of which a subset can be selected (Fig. 5C, middle). The controller shows only the parameters in the subset and allows the user to explicitly modify their values (Fig. 5C, right). Optionally, users can assign spatial positions to neurons or stimulating devices in the network.

During editing, each change of the network is logged such that the user can go back in history and undo and redo changes.

## Code generation from the network graph

The network graph is automatically rendered into executable PyNEST (Eppler et al., 2009) code with a direct correspondence between graphical elements and textual code snippets (Fig. 6). PyNEST is the

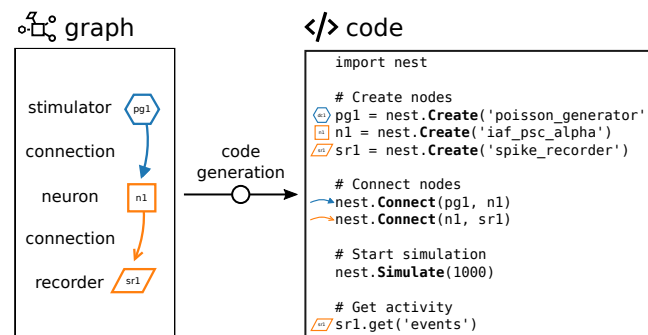

**Figure 6: Code generation through visual network construction.** The graphically composed network (see Fig. 5) is automatically translated into textual source code. Visual elements in the network graph (shapes for nodes and arrows for connections) are associated with generated code lines. The resulting script is a complete definition of a simulation experiment in PyNEST with code blocks to be executed in succession: ‘Create nodes’, ‘Connect nodes’, ‘Start simulation’, and ‘Get activity’. The sketched network of only three connected nodes (stimulator to neuron to recorder) is a minimal example for illustration; further details such as parameter values set via the GUI are also turned into code.

Python interface to the simulation engine NEST (Gewaltig and Diesmann, 2007). The script is structured in blocks that are produced in the same order as they are executed in the back end when a simulation run is inquired. First, the technical setup of the simulator is added to the script: modules are imported and further parameters can be defined to be passed to the simulation kernel. The following code lines in Fig. 6 account for creating and connecting the nodes as defined by the user in the network editor. Afterwards, the command for initiating the state-propagation phase is defined, which is the actual simulation. The last block contains the code for collecting the recorded network activity data for subsequent visualization and analysis in the ‘activity explorer’. Clicking the ‘Simulate’ button triggers the execution of this code with NEST.

## Interactive data analysis with the activity explorer

Dependent on properties and parameterization of recording devices in the constructed network, different types of activity data are returned from NEST for inspection in the activity explorer. The data comprises unique IDs of sending neurons and so-called events, which are either spikes (discrete time stamps) or quasi-analog signals, e.g., membrane potentials (sampled in given time intervals). The charts in the bottom left panel of Fig. 7 show vertically arranged traces of membrane potentials as line graphs, a spike raster as scatter plot, and computed spike counts across time as histogram. If the data additionally contains neuron positions in 2D or 3D space, the activity can also be animated in a 3D graph (Fig. 7, bottom right). Beside the visual analysis, NEST Desktop also has the possibility to display basic spike-

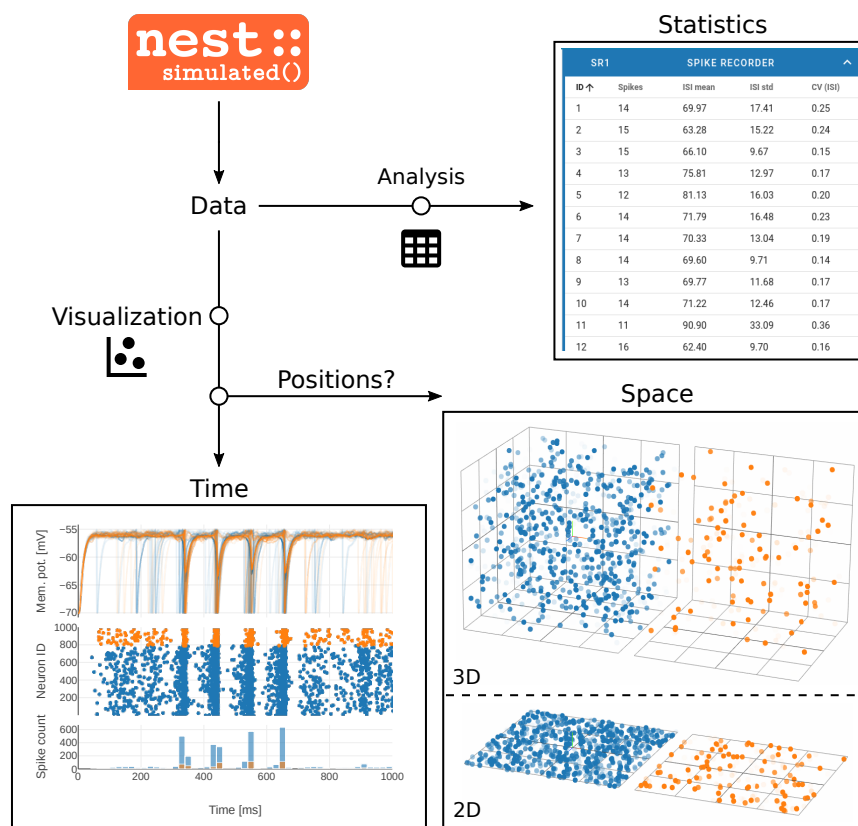

**Figure 7: Data analysis and visualization.** The NEST simulator executes the network simulation and returns recorded activity data to be analyzed and visualized (top left). Quasi-analog signals like membrane potentials and discrete spike times can be displayed across time (bottom left). Such visualization is accompanied by basic analysis like the computation of spike counts. If the neurons in the simulated network are arranged in space, a 2D or 3D animation offers a view of the ongoing activity at the respective neuronal positions (bottom right). Calculated quantities are presented in table format (top right).

train statistics in table format. The top right panel of Fig. 7 demonstrates such a table with statistics calculated from the raw data.

## Project management and image export

NEST Desktop sessions are treated as projects and handled by the project manager (Fig. 8A, top): one can either start a new project and construct a network from scratch or load a previously saved project to extend an existing network structure. Existing projects, set up and saved at another time or on another machine, can be duplicated, updated, or deleted. Projects are synchronized with a built-in database in the browser on the client-side, but they can also be exported to and loaded from file (Fig. 8A, bottom).

Apart from saving the status of a project, NEST Desktop also encourages the export of figures showing network definitions or activity charts to protocol observations. Particularly suitable for this purpose is a

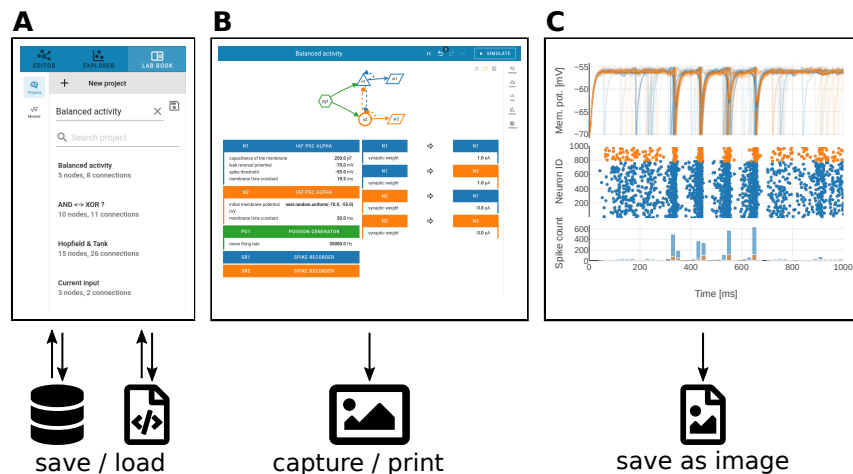

Figure 8: **Project archiving and image export.** (A) Previously constructed networks (see Fig. 5) can be stored in a database within NEST Desktop or exported to a file for later reloading. An example list of saved, loadable projects is shown. (B) The network graph and its description can be captured as screenshot. (C) Charts visualizing activity data (see Fig. 7) allow for export to either a rendered image (‘.png’) or a vector graphic (‘.svg’).

view that resembles a ‘lab book’ (Fig. 8B): the graphical representation of the network is here displayed above a two-column table specifying nodes and connections to provide a compact overview. For capturing the graph and its parameters, we recommend using an external screenshot tool or printing to file from the browser (Fig. 8B). For saving activity charts, however, NEST Desktop provides internal functionality: those figures can be exported directly as high-quality vector-graphics or as pixelated images (Fig. 8C).

## Use case: NEST Desktop in the classroom

Here, we illustrate how NEST Desktop may be employed as a learning and teaching tool in a hands-on session of an introductory course of computational neuroscience. The students are expected to have only limited prior knowledge in the field and the lessons are supposed to teach them the principles of spiking neuronal networks. Computer simulations are intended to help them develop an intuitive understanding of the network dynamics. The lesson discussed here aims to construct a network of two interconnected populations of leaky-integrate-and-fire (LIF) neurons driven by an external input. The activities of the excitatory and inhibitory neuron populations should be balanced. This scenario describes a classical example of an emergent property in a rather simple network configuration ([Vreeswijk and Sompolinsky, 1996](#); [Brunel, 2000](#)). Our fictional student Noel is highly motivated to learn about this topic and the method of neuronal network simulations, but he is inexperienced in programming. We will explain how

NEST Desktop helps Noel to achieve the goal nevertheless.

The course takes place in the university's computer lab and has been prepared by the tutor Juno. She consulted the documentation of how to deploy NEST Desktop in a virtual machine of a computer pool (Fig. 3, ReadTheDocs) and found a pre-built container with the tool (Fig. 3, whale, Docker). After following a few steps, NEST Desktop is ready to be used by the students without the need of manual installation or configuration (Fig. 3, laptop/cloud).

Noel opens the network editor (Fig. 5A) and begins to set up the network. In the two-dimensional scratch panel, he creates one neuron node and one recording device per population to track the neuronal activity (Fig. 5B, left). He adds a single stimulus device to provide external input to both populations. The next step is to connect the neuron and device nodes (Fig. 5B, right). Each neuron node is connected to the other one and to itself; the neurons are connected randomly (pairwise Bernoulli) with a given connection probability. Noel notes that the nodes are differently labelled and colored which helps matching nodes and connections with the information shown in the other panels (Fig. 5).

Subsequently, Noel opens the network controller and specifies the models represented by the nodes. He finds the neuron model he is looking for: 'IAF psc alpha', a current-based 'leaky integrate-and-fire' neuron with alpha-shaped post-synaptic currents (Fig. 5C, left). Noel chooses model parameters which are relevant for the exercise (Fig. 5C, middle). These selected parameters can then be modified from their preset default values by either using sliders, or by typing the intended values into the input field (Fig. 5C, right). An important parameter is the number of elements in a node, which is also referred to as population size. In this example, the excitatory population is larger than the inhibitory one, but inhibitory connections are stronger for compensation. Noel sets the population sizes of both neuron nodes accordingly and also modifies other parameter values where necessary.

In the code editor, Noel finds the scripting code that is automatically generated from the graphically constructed network (Fig. 6). Every visual element has its respective counterpart in the script and Noel recognizes the model names and the parameters he has set earlier via the GUI. Noel finds out that he can modify the code in the editor directly. Just for testing this option, he changes the value of one parameter. Noel learns that the programming language of this script is called PyNEST. As the network is now completely defined, Noel clicks the 'Simulate' button, which triggers the transmission and the execution of the PyNEST script in the background.



After the simulation, which only took a few seconds, Noel starts exploring the recorded network dynamics in the activity explorer. He chose spike recording devices and focuses now on analyzing the spiking activity. A raster plot shows the spike times of both neuronal populations (Fig. 7, bottom left). In this plot, Noel registers noise-like activity of both neuronal populations. He pans the plot window to the episode of interest, zooms in on some individual neurons in the network and observes that they emit spikes at non-synchronous, seemingly random time points. The subjacent histogram displays the spike count in time bins, accounting for all neurons in each population. Noel interactively changes the bin width and observes how the spike count adjusts. Although individual neurons only occasionally contribute a spike, the population spike counts are stationary over time reflecting the balance between excitation and inhibition. Via the side navigation, Noel opens a table showing statistical measures of the spike data of individual neurons (Fig. 7, top right). The coefficient of variation of the inter-spike intervals ( $CV_{ISI}$ ) is just below one for most neurons, indicating that the spiking activity in the network is almost as irregular as a Poisson process (Softky and Koch, 1993). Noel concludes that both neuronal populations operate in the asynchronous-irregular (AI) dynamical regime (Brunel, 2000). Next, Noel returns to the network editor, adds a stimulus device to apply negative currents to the inhibitory population during a defined period of time. He also adds multi-purpose measurement devices ('multimeter') to record the neurons' membrane potentials as quasi-analog signals. He re-simulates and observes changes in the network activity: during the stimulation phase, both populations exhibit highly synchronous and oscillatory behavior, visible in the membrane potential traces, the spike raster, and the population spike count histogram (Fig. 7, bottom left). As a last test, he randomly assigns positions to the neurons and observes the animated activity resolved in space (Fig. 7, bottom right).

Noel finishes the exploration and analysis of network dynamics and saves the project with a descriptive name (Fig. 8A). The project management panel allows him to reload the project later to resume the exploration at the point where it was stopped. He also exports the project to a file in order to load it on his home computer later, or to share it with another student. Noel's final task is to document his exploration of the balanced network model and he writes a report about the simulation setup and the analysis of the simulated network activity. To enhance the protocol with graphics, Noel first uses the built-in screenshot option to capture the lab book as an overview of the network (Fig. 8B). A display of the simulated data should have high quality to resolve important details of the spiking activity. Noel finds that he can export the charts as Scalable Vector Graphics (.svg) which meets that requirement (Fig. 8C).



Ultimately, Noel includes the figures into his protocol and moves on to the next lesson.

## **NEST Desktop beyond teaching**

Here, we provide a short outlook on the potential usage of NEST Desktop beyond its major teaching purpose. Juno is a researcher and, apart from teaching courses, she studies spiking network models for her own scientific work. NEST Desktop has proven useful more than once in quickly investigating certain features of the simulator NEST, or testing the dynamics of a toy network before integrating the insights into larger models expressed in scripted code. If she is not familiar with the correct NEST syntax, she has even found herself constructing the respective network parts graphically in NEST Desktop and obtaining the executable PyNEST code from the build-in code-generation functionality. But NEST Desktop does not only help Juno to acquire a better intuition for her models, she also uses the tool for explaining her work to others. She finds that the audience can better grasp network structures and mechanisms behind activity dynamics if presented interactively. After her talks, she shares network configuration files with interested members of the audience who can then continue exploring the shown networks with NEST Desktop on their own machines. Thus, NEST Desktop can also support the daily routine of researchers in various aspects.

## **Discussion**

NEST Desktop is an interactive, web-based Graphical User Interface (GUI) to the neuronal network simulation code NEST, primarily developed for teaching the fundamentals of computational neuroscience. Students can choose from a number of available neuron, device and synapse models, combine them into network structures, and set custom parameters. The graphically constructed network is automatically converted into scripted code which the simulation engine NEST executes in the background. Simulation results are returned to the GUI, where the students can explore neuronal activity with a selection of analysis tools. Hence, our approach demonstrates a conceptual marriage of a powerful simulation engine and an intuitive, user-friendly GUI.

The use case “NEST Desktop in the classroom” which is described in the Results section is based on the actual use of NEST Desktop for teaching computational neuroscience as part of the university education of bachelor and master students and in independent tutorials. Particular challenges of these courses

are the very heterogeneous levels of programming skills and background knowledge in neuroscience among the participants. NEST Desktop has already proven to support teaching successfully both in the classical classroom setting with physical attendance and in online formats. Online formats have been boosted due to the COVID-19 pandemic and NEST Desktop has shown itself to be a valuable tool in this situation. In online courses, the students have the chance to contact the tutors and lecturers using video conference tools or via a messenger channel to get answers to their questions and discuss problems regarding the course content or NEST Desktop usage. All these teaching events put NEST Desktop to the test. Gathering feedback from students helps to identify shortcomings and drives the development of the tool. We have observed that the students generally show a reasonably fast learning success making a one-week course feasible. They are typically able to operate NEST Desktop independently already on the first day. The experience they gain from exploring networks using the tool helps them to answer questions from computational neuroscience posed to them in the course script. In an informal round of feedback, students attested NEST Desktop a good level of usability and they gave various positive comments on their user experience. However, there is still room for improvement due to the limited feature set of NEST Desktop as exposed by the students' feedback.

Based on the useful feedback from given courses and beyond, we identify the following concrete directions in which the development of NEST Desktop may continue: while NEST Desktop already strictly separates the GUI from the simulation engine, one could even expand on the modularity. A possible next step would be to separate GUI and data analysis, as well as storage. The front end engine obviously has limited capability for advanced mathematical operations, like computing spike train correlations or the power spectrum using the Fast Fourier Transform (FFT). An interface to the Python-based data analysis community toolbox Elephant ([Denker et al., 2018](#)), which offers such functionality, therefore seems to be a more appropriate and general solution. The same front end could even be used with multiple back ends, meaning with simulator engines different from NEST; for example a neuromorphic hardware system.

In computational neuroscience, several GUIs have already been developed over the last two decades, mostly linked to a specific simulation engine (see Table 1). Most modern GUIs run in a web-browser (HTML) and are therefore platform-independent and installation-free. Table 2 identifies which features of NEST Desktop are available to some extent also in the other tools existing. The design focus, i.e., whether they target rather the visualization of the network graph or the activity, is different between these

|                         | Network   |      | Simulation |     | Activity  |
|-------------------------|-----------|------|------------|-----|-----------|
|                         | visualize | edit | code       | run | visualize |
| <b>NEST Desktop</b>     | x         | x    | x          | x   | x         |
| CellExplorer            |           |      |            |     | x         |
| GENESIS GUI             |           | x    |            | x   | x         |
| N2A                     |           | x    | x          | (x) |           |
| Nengo GUI               | x         | x    | x          | x   | x         |
| NESTInstrumentationApp  | x         | x    |            | x   |           |
| NetPyNE UI              | x         | x    | (x)        | x   | x         |
| neuroConstruct          | x         | x    |            | (x) | x         |
| Neuron GUI (x11)        | x         | x    |            | x   | x         |
| Neuron UI (HTML)        | x         | x    | (x)        | x   | x         |
| Neuronify               | x         | x    |            | x   | x         |
| Neuronvisio             | x         |      |            | x   | x         |
| nuSPIC                  | x         | x    |            | x   | x         |
| Open Source Brain (OBS) | x         | x    | (x)        | x   | x         |
| SLIDE                   | x         | x    |            | (x) |           |
| SNN3DViewer             | x         |      |            | x   | x         |
| SpineCreator            | x         | x    |            |     |           |
| The Virtual Brain (TVB) | x         | x    |            | x   | x         |
| VIOLA                   |           |      |            |     | x         |
| Visbrain                | x         | x    |            | x   | x         |
| ViSimpl                 | x         | x    |            |     | x         |
| VisNEST                 | x         |      |            |     | x         |

Table 2: **Characterization of GUIs.** The GUIs from Table 1 (here sorted alphabetically after NEST Desktop) are compared based on which steps of network construction, simulation, and activity analysis they cover. The network aspect is split up into visualizing networks and the possibility to edit them by means of the GUI. For the simulation step, the table distinguishes between a feature to generate and display simulation code and the option to actually run a simulation. The marker ‘(x)’ in the simulation column means that (executable) code is provided but rather debug code or console instead of the actual simulation code.

tools, although many show some functionality of both. The earlier graphical interface ‘SLIDE’ (Matyak et al., 1995; Gewaltig et al., 1996) for NEST has not been developed further but next to network structure and activity introduced a third aspect: the protocol of a virtual experiment. These ideas were inspired by visual programming at the time. To our knowledge they have not been picked-up again in the context of neuronal network simulation, but movie editing software like ‘Blender’ (Bruns, 2020, the similarity was pointed out by Marc-Oliver Gewaltig in private communication) has aspects of this. Because of the problems in stabilizing and maintaining graphical user interfaces in the middle of the 1990s (Senk et al., 2018, contains some review) NEST development has primarily focused on the independent simulation engine. ‘Open Source Brain’ (Gleeson et al., 2019), ‘Neuron UI’ and ‘NetPyNE UI’ (Dura-Bernal et al., 2019) are extensions of ‘Geppetto’ (Cantarelli et al., 2018) framework but ‘Neuron UI’ appears to be no longer in development. From the user perspective, the tools ‘Open Source Brain’, ‘NetPyNE UI’

and ‘Nengo GUI’ (Bekolay et al., 2014) follow a similar approach as NEST Desktop. NEST Desktop, however, is unique in that it employs a standard simulation engine as a back end, and that it provides access to the simulation scripts for learning and re-use. This not only enables additional modification to the generated code before sending to the back end (as described in the use case) but also gives the learner the opportunity to gather first-hand experience with the actual code. This facilitates the later step to programming PyNEST scripts without the need of NEST Desktop and, thus, enables the creation and simulation of highly complex models with NEST as is the case in most scientific use cases of NEST. Finally, in contrast to the other outlined projects, the primary motivation of our work is to create a self-contained educational tool using the language and symbols of the problem domain.

NEST Desktop supports teaching of computational neuroscience by making computer simulations intuitively accessible. The use of NEST Desktop actually reverses the sequence of skills to be learned. Courses can now directly start with scientific content, without students having to learn scientific programming first. Once the students have developed their intuition for neuronal network models, it is much easier for them to get started with the actual scripting of simulations and conduct more sophisticated research projects in the field on their own.

## Acknowledgments

We thank Jens Buchertseifer for code review of NEST Desktop and Jochen Martin Eppler for discussion and development of NEST Server. Moreover, we thank Sara Konradi, Jessica Mitchell, Dennis Terhorst, Steffen Graber and the community of NEST developers for discussion, review of the user documentation and the web page on EBRAINS. At Freiburg, we thank tutors and students of the Bernstein Center for beta-testing NEST Desktop, enduring the early days, and valuable feedback. We further gratefully acknowledge the service of the HBP Support Team for deployment on EBRAINS as well as the operators at the Rechenzentrum of University of Freiburg for the deployment on statewide bwCloud infrastructure. Finally, we thank Thomas Matyak and his aunt for uncovering the thesis on SLIDE, and the research assistant (HiWi) Peter Bouss for finding Thomas.

## Funding sources

This project has received funding from the European Union’s Horizon 2020 Framework Programme for Research and Innovation under Specific Grant Agreement No. 785907 (Human Brain Project SGA2) and No. 945539 (Human Brain Project SGA3). This project was funded by the Helmholtz Association Initiative and Networking Fund under project number SO-092 (Advanced Computing Architectures, ACA). This work was supported by the DFG Excellence Cluster BrainLinks-BrainTools (grant EXC 1086). The HPC facilities are funded by the state of Baden-Württemberg through bwHPC and DFG grant INST 39/963-1 FUGG.

## References

- Trevor Bekolay, James Bergstra, Eric Hunsberger, Travis DeWolf, Terrence C. Stewart, Daniel Rasmussen, Xuan Choo, Aaron Russell Voelker, and Chris Eliasmith. Nengo: A Python tool for building large-scale functional brain models. *Frontiers in Neuroinformatics*, 7(JAN):1–13, 2014. doi: 10.3389/fninf.2013.00048.
- James M Bower and David Beeman. *The book of GENESIS: exploring realistic neural models with the GEneral NEural Simulation System*. Springer Science & Business Media, 2012.
- Romain Brette, Michelle Rudolph, Ted Carnevale, Michael Hines, David Beeman, James M. Bower, Markus Diesmann, Abigail Morrison, Philip H. Goodman, Frederick C. Harris, Milind Zirpe, Thomas Natschläger, Dejan Pecevski, Bard Ermentrout, Mikael Djurfeldt, Anders Lansner, Olivier Rochel, Thierry Vieville, Eilif Muller, Andrew P. Davison, Sami El Boustani, and Alain Destexhe. Simulation of networks of spiking neurons: A review of tools and strategies. *Journal of Computational Neuroscience*, 23(3):349–398, 2007. doi: 10.1007/s10827-007-0038-6.
- Nicolas Brunel. Dynamics of sparsely connected networks of excitatory and inhibitory spiking neurons. *Journal of Computational Neuroscience*, 8(3):183–208, 2000. doi: 10.1023/a:1008925309027.
- Nico Bruns. Blender: Universal 3D processing and animation software. *Unfallchirurg*, 123(9):747–750, 2020. doi: 10.1007/s00113-020-00836-0.
- Matteo Cantarelli, Boris Marin, Adrian Quintana, Matt Earnshaw, Robert Court, Pdraig Gleeson, Salvador Dura-Bernal, R. Angus Silver, and Giovanni Idili. Geppetto: a reusable modular open platform

- for exploring neuroscience data and models. *Philosophical Transactions of the Royal Society B: Biological Sciences*, 373(1758):20170380, 2018. doi: 10.1098/rstb.2017.0380.
- Ruth Colvin Clark and Richard E. Mayer. *e-Learning and the Science of Instruction*. Pfeiffer, 2011. doi: 10.1002/9781118255971.
- Etienne Combrisson, Raphael Vallat, Christian O'Reilly, Mainak Jas, Annalisa Pascarella, Anne-lise Saive, Thomas Thiery, David Meunier, Dmitrii Altukhov, Tarek Lajnef, Perrine Ruby, Aymeric Guillot, and Karim Jerbi. Visbrain: A Multi-Purpose GPU-Accelerated Open-Source Suite for Multimodal Brain Data Visualization. *Frontiers in Neuroinformatics*, 13(March):1–14, 2019. doi: 10.3389/fninf.2019.00014.
- A. J. Cope, P. Richmond, S. S. James, K. Gurney, and D. J. Allerton. SpineCreator: a Graphical User Interface for the Creation of Layered Neural Models. *Neuroinformatics*, 15(1):25–40, 2017. doi: 10.1007/s12021-016-9311-z.
- T. de Jong, M. C. Linn, and Z. C. Zacharia. Physical and Virtual Laboratories in Science and Engineering Education. *Science*, 340(6130):305–308, 2013. doi: 10.1126/science.1230579.
- Michael Denker, A. Yegenoglu, and Sonja Grün. Collaborative HPC-enabled workflows on the HBP Collaboratory using the Elephant framework. In *Neuroinformatics 2018*, page P19, 2018. doi: 10.12751/incf.ni2018.0019.
- Svenn-Arne Dragly, Milad Hobbi Mobarhan, Andreas Våvang Solbrå, Simen Tennøe, Anders Hafreager, Anders Malthe-Sørenssen, Marianne Fyhn, Torkel Hafting, Gaute T. Einevoll, Andreas Våvang Solbrå, Simen Tennøe, Anders Hafreager, Anders Malthe-Sørenssen, Marianne Fyhn, Torkel Hafting, Gaute T. Einevoll, and Public Awareness. Neuronify: An Educational Simulator for Neural Circuits. *Eneuro*, 4(April):1–13, 2017. doi: 10.1523/ENEURO.0022-17.2017.
- Salvador Dura-Bernal, Benjamin A. Suter, Padraig Gleeson, Matteo Cantarelli, Adrian Quintana, Facundo Rodriguez, David J. Kedziora, George L. Chadderdon, Cliff C. Kerr, Samuel A. Neymotin, Robert A. McDougal, Michael Hines, Gordon M.G. Shepherd, and William W. Lytton. NetPyNE, a tool for data-driven multiscale modeling of brain circuits. *eLife*, 8:1–26, 2019. doi: 10.7554/eLife.44494.
- Gaute T. Einevoll, Alain Destexhe, Markus Diesmann, Sonja Grün, Viktor Jirsa, Marc de Kamps,

- Michele Migliore, Torbjørn V. Ness, Hans E. Plesser, and Felix Schürmann. The Scientific Case for Brain Simulations. *Neuron*, 102(4):735–744, 2019. doi: 10.1016/j.neuron.2019.03.027.
- Jochen Martin Eppler, Moritz Helias, Eilif Muller, Markus Diesmann, and Marc Oliver Gewaltig. PyNEST: A convenient interface to the NEST simulator. *Frontiers in Neuroinformatics*, 2(JAN): 1–12, 2009. doi: 10.3389/neuro.11.012.2008.
- Sergio E. Galindo, Pablo Toharia, Oscar D. Robles, and Luis Pastor. ViSimpl: Multi-view visual analysis of brain simulation data. *Frontiers in Neuroinformatics*, 10(OCT), 2016. ISSN 16625196. doi: 10.3389/fninf.2016.00044.
- Marc-Oliver Gewaltig and Markus Diesmann. NEST (NEural Simulation Tool). *Scholarpedia*, 2(4): 1430, 2007. doi: 10.4249/Scholarpedia.1430.
- Marc-Oliver Gewaltig, Thomas Matyak, Markus Diesmann, and Ad Aertsen. SLIDE: a Graphical Environment for Neural Simulations. In H.-U. Schnitzler and N. Elsner, editors, *Brain and Evolution. Proc 24th Göttingen Neurobiol Conf*, volume 2, page 475. Thieme, Stuttgart, New York, 1996.
- Padraig Gleeson, Volker Steuber, and R. Angus Silver. neuroConstruct: A Tool for Modeling Networks of Neurons in 3D Space. *Neuron*, 54(2):219–235, 2007. doi: 10.1016/j.neuron.2007.03.025.
- Padraig Gleeson, Matteo Cantarelli, B. Marin, Adrian Quintana, Matt Earnshaw, S. Sadeh, Eugenio Piasini, Justas Birgiolas, Robert C. Cannon, N. Alex Cayco-Gajic, Sharon Crook, Andrew P. Davison, Salvador Dura-Bernal, András Ecker, Michael L. Hines, Giovanni Idili, Frederic Lanore, Stephen D. Larson, William W. Lytton, Amitava Majumdar, Robert A. McDougal, Subhashini Sivagnanam, Sergio Solinas, R. Stanislovas, Sacha J. van Albada, Werner van Geit, and R. Angus Silver. Open Source Brain: A Collaborative Resource for Visualizing, Analyzing, Simulating, and Developing Standardized Models of Neurons and Circuits. *Neuron*, 103(3):395–411.e5, 2019. doi: 10.1016/j.neuron.2019.05.019.
- Jan Hahne, Sandra Diaz, Alexander Patronis, Wolfram Schenck, Alexander Peyser, Steffen Graber, Sebastian Spreizer, Stine Brekke Vennemo, Tammo Ippen, Håkon Mørk, Jakob Jordan, Johanna Senk, Sara Konradi, Philipp Weidel, Tanguy Fardet, David Dahmen, Dennis Terhorst, Jonas Stappmanns, Guido Trensche, Alexander van Meegen, Jari Pronold, Jochen Martin Eppler, Charl Linssen, Abigail Morrison, Ankur Sinha, Jessica Mitchell, Susanne Kunkel, Rajalekshmi Deepu, Espen Ha-



- gen, Tom Vierjahn, Nilton Liuji Kamiji, Robin de Schepper, Pedro Machado, Jasper Albers, Wouter Klijn, Alex Myczko, William Mayner, Pooja Nagendra Babu, Hanjia Jiang, Sebastian Billaudelle, Benedikt S. Vogler, Guilherme Miotto, Alberto Antonietti, Aitor Morales-Gregorio, Joris Dolderer, Younes Bouhadjar, and Hans Ekkehard Plesser. Nest 3.0, 2021.
- Michael Hines. The NEURON Simulation Program. In *Neural Network Simulation Environments*, pages 147–163. The Springer International Series in Engineering and Computer Science, 1993. doi: 10.1007/978-1-4615-2736-7\_8.
- Michael L. Hines and Nicholas Ted Carnevale. The NEURON simulation environment. *Neural computation*, 9(6):1179–209, 1997. doi: 10.1162/neco.1997.9.6.1179.
- Andrzej Kasiński, Juliusz Pawłowski, and Filip Ponulak. ‘SNN3DViewer’ - 3D Visualization Tool for Spiking Neural Network Analysis. In Leonard Bolc, Juliusz L Kulikowski, and Konrad Wojciechowski, editors, *Computer Vision and Graphics*, pages 469–476. Springer Berlin Heidelberg, 2009. ISBN 978-3-642-02345-3.
- Michele Mattioni, Uri Cohen, and Nicolas Le Novère. Neuronvisio: A Graphical User Interface with 3D Capabilities for NEURON. *Frontiers in Neuroinformatics*, 6(JUNE):1–8, 2012. doi: 10.3389/fninf.2012.00020.
- Thomas Matyak, Marc-Oliver Gewaltig, Markus Diesmann, and Ad Aertsen. SLIDE: A graphical user interface for SYNOD. Internal Document, Institut für Neuroinformatik, Ruhr-Universität Bochum, Germany, 1995.
- Christian Nowke, Maximilian Schmidt, Sacha J. Van Albada, Jochen M. Eppler, Rembrandt Bakker, Markus Diesmann, Bernd Hentschel, and Torsten Kuhlen. VisNEST - Interactive analysis of neural activity data. *BioVis 2013 - IEEE Symposium on Biological Data Visualization 2013, Proceedings*, pages 65–72, 2013. doi: 10.1109/BioVis.2013.6664348.
- Peter C Petersen, Joshua H Siegle, Nicholas A Steinmetz, Sara Mahallati, and György Buzsáki. CellExplorer: a graphical user interface and a standardized pipeline for visualizing and characterizing single neurons. *bioRxiv*, 2020. doi: 10.1101/2020.05.07.083436.
- Fredrick Rothganger, Christina E. Warrender, Derek Trumbo, and James B. Aimone. N2A: A compu-



- tational tool for modeling from neurons to algorithms. *Frontiers in Neural Circuits*, 8(JAN):1–12, 2014. doi: 10.3389/fncir.2014.00001.
- Paula Sanzleon, Stuart A. Knock, M. Marmaduke Woodman, Lia Domide, Jochen Mersmann, Anthony R. McIntosh, and Viktor Jirsa. The virtual brain: A simulator of primate brain network dynamics. *Frontiers in Neuroinformatics*, 7(MAY), 2013. ISSN 16625196. doi: 10.3389/fninf.2013.00010.
- Johanna Senk, Corto Carde, Espen Hagen, Torsten W. Kuhlen, Markus Diesmann, and Benjamin Weyers. VIOLA — A multi-purpose and web-based visualization tool for neuronal-network simulation output. *Frontiers in Neuroinformatics*, 12(March), 2018. doi: 10.3389/fninf.2018.00075.
- Johanna Senk, Birgit Kriener, Mikael Djurfeldt, Nicole Voges, Lisa Schüttler, Gabriele Gramelsberger, Hans E. Plesser, Markus Diesmann, and Sacha J. van Albada. Systematic textual and graphical description of connectivity. In *Bernstein Conference 2020*. G-Node, 2020. doi: 10.12751/NNCN.BC2020.0263.
- W. R. Softky and C. Koch. The highly irregular firing of cortical cells is inconsistent with temporal integration of random EPSPs. *Journal of Neuroscience*, 13(1):334–350, 1993. doi: 10.1523/jneurosci.13-01-00334.1993.
- Sebastian Spreizer. NEST Desktop: an educational GUI application. In *Bernstein Conference 2018*, 2018. doi: 10.12751/nncn.bc2018.0167.
- Sebastian Spreizer, Johanna Senk, Stefan Rotter, Markus Diesmann, and Benjamin Weyers. NEST Desktop: A web-based GUI for the NEST Simulator. In *Bernstein Conference 2019*, 2019. doi: 10.12751/nncn.bc2019.0243.
- Sebastian Spreizer, Johanna Senk, Stefan Rotter, Markus Diesmann, and Benjamin Weyers. NEST Desktop: A web-based GUI for the NEST Simulator. In *Bernstein Conference 2020*, 2020. doi: 10.12751/nncn.bc2020.0266.
- Ruben A. Tikidji-Hamburyan, Vikram Narayana, Zeki Bozkus, and Tarek A. El-Ghazawi. Software for Brain Network Simulations: A Comparative Study. *Frontiers in Neuroinformatics*, 11(July):1–16, 2017. doi: 10.3389/fninf.2017.00046.
- I. Vlachos, Y.V. Zaytsev, S. Spreizer, A. Aertsen, and A. Kumar. Neural system prediction and identification challenge. *Frontiers in Neuroinformatics*, 7(DEC), 2013. doi: 10.3389/fninf.2013.00043.

C. v. Vreeswijk and H Sompolinsky. Chaos in Neuronal Networks with Balanced Excitatory and Inhibitory Activity. *Science*, 274(5293):1724–1726, 1996. ISSN 0036-8075. doi: 10.1126/science.274.5293.1724.
